# Supplementary material for: Endogenous RNAi pathway evolutionarily shapes the destiny of the antisense lncRNAs transcriptome
Source: Life Sci Alliance. 2019 Aug 28;2(5):e201900407. doi: 10.26508/lsa.201900407 (PMC6713810; doi:10.26508/lsa.201900407)
Supplement: Supplementary file 1 [file LSA-2019-00407_TableS1.xlsx]

## Sheet: Rrp6-sensitive XUTs
ID	rrp6/WT ratio	Adjusted P-value
XUT0001	3.29791	2.62313e-08
XUT0002	12.655	2.18221e-112
XUT0004	3.43116	7.95724e-07
XUT0006	4.45816	0.033069
XUT0008	2.33523	1.55355e-11
XUT0009	2.00019	0.00721922
XUT0011	2.28229	0.0200133
XUT0013	4.31973	0.0042716
XUT0017	7.62771	0.000422208
XUT0018	4.1607	1.29475e-18
XUT0019	3.45785	0.0309944
XUT0020	6.16844	0.00363834
XUT0021	4.05289	0.000350341
XUT0023	3.2819	0.000173748
XUT0024	3.97175	0.0259579
XUT0026	4.35411	1.42083e-33
XUT0031	5.11951	3.59968e-12
XUT0032	3.50708	0.00226559
XUT0042	2.24545	2.40338e-06
XUT0043	4.60481	0.000320862
XUT0044	2.64584	7.21349e-05
XUT0045	2.59573	0.000774807
XUT0047	5.69269	1.60743e-05
XUT0053	4.69303	8.0777e-07
XUT0054	2.38442	6.79046e-06
XUT0055	6.15826	1.67828e-10
XUT0057	2.04966	2.23162e-05
XUT0062	4.25185	0.00263494
XUT0064	2.98596	0.000898127
XUT0066	3.74376	6.76401e-06
XUT0067	2.21518	1.56478e-29
XUT0068	2.49119	4.50315e-06
XUT0074	6.26594	6.28323e-05
XUT0078	5.95594	0.000143918
XUT0083	3.79236	0.0261112
XUT0084	2.02866	8.04422e-06
XUT0087	2.47878	2.69989e-05
XUT0088	2.45377	7.3001e-18
XUT0092	4.13808	4.99202e-06
XUT0095	2.69894	0.00316751
XUT0096	4.15638	8.48365e-07
XUT0099	8.61255	4.35612e-74
XUT0100	5.31899	1.28664e-10
XUT0104	3.71385	2.47485e-15
XUT0107	2.66069	0.0403552
XUT0109	2.03963	0.00569993
XUT0110	3.82844	3.16203e-08
XUT0113	7.01499	6.40092e-55
XUT0114	2.12823	0.000856848
XUT0117	5.88734	5.88378e-27
XUT0118	3.08152	9.1472e-16
XUT0123	4.50137	0.000843817
XUT0125	2.44394	1.55464e-06
XUT0126	4.42018	0.00326348
XUT0136	5.14238	0.00329051
XUT0138	3.96826	1.36519e-19
XUT0139	4.02717	7.55927e-12
XUT0141	3.60777	2.98959e-20
XUT0143	2.65453	0.0243043
XUT0145	3.26423	0.0362513
XUT0147	2.85055	0.0271358
XUT0149	3.19238	0.00210919
XUT0150	3.87072	0.0185438
XUT0155	2.66725	1.85284e-10
XUT0157	4.30543	4.306e-17
XUT0159	11.2636	1.47402e-65
XUT0160	3.01833	9.96236e-07
XUT0161	8.07016	5.22132e-16
XUT0162	4.58017	2.93665e-07
XUT0163	3.4865	0.0137023
XUT0164	2.80515	7.66371e-05
XUT0166	4.56975	0.000239449
XUT0167	4.70615	4.60272e-07
XUT0168	4.05527	0.00312172
XUT0171	3.24691	1.1835e-10
XUT0173	5.33235	4.29311e-43
XUT0174	2.27115	5.34035e-05
XUT0175	4.57299	0.00573943
XUT0176	4.44037	1.08719e-83
XUT0178	2.26284	1.77163e-10
XUT0183	28.7358	2.38073e-13
XUT0187	2.69763	9.37588e-08
XUT0190	2.36721	8.41897e-16
XUT0191	3.9589	1.98021e-19
XUT0194	2.26065	0.00737907
XUT0195	2.59472	0.000337432
XUT0196	6.3872	0.000245337
XUT0200	4.2362	0.0446326
XUT0201	4.64025	0.0135569
XUT0202	7.49749	9.95331e-18
XUT0207	3.24471	2.38718e-11
XUT0208	3.74083	8.04738e-05
XUT0210	2.52176	0.00046689
XUT0220	4.27421	1.69068e-06
XUT0221	7.2213	1.85691e-53
XUT0222	7.0313	1.11094e-08
XUT0227	3.82971	6.83364e-08
XUT0229	2.84662	0.000176056
XUT0234	4.21797	0.0154498
XUT0236	2.8415	3.3179e-15
XUT0240	2.31565	4.56083e-11
XUT0242	2.85279	7.52342e-18
XUT0243	2.99164	0.00810248
XUT0244	3.13214	0.0321582
XUT0245	2.45628	0.0157833
XUT0250	2.24119	1.69006e-17
XUT0251	3.71002	0.000333674
XUT0261	3.40391	0.000528989
XUT0262	5.05021	0.0055668
XUT0264	3.38829	2.01511e-05
XUT0267	5.66733	2.40812e-09
XUT0270	5.08859	2.45742e-21
XUT0271	7.17903	3.12972e-13
XUT0273	3.48062	1.26404e-15
XUT0278	2.59445	1.18076e-05
XUT0279	6.09317	0.00222853
XUT0293	4.02268	4.70413e-06
XUT0298	4.24587	8.63835e-05
XUT0299	3.59031	2.13788e-08
XUT0300	12.3471	1.50302e-12
XUT0302	2.80507	2.06871e-12
XUT0311	3.6667	1.10864e-06
XUT0312	2.60021	0.024045
XUT0317	2.62204	3.92018e-06
XUT0319	3.96652	0.0322109
XUT0321	3.92264	7.26339e-06
XUT0322	5.45171	5.3945e-11
XUT0325	2.52857	0.00730163
XUT0327	2.33865	2.07464e-08
XUT0328	8.16743	2.72021e-14
XUT0329	5.20961	1.58547e-09
XUT0332	10.51	5.51117e-44
XUT0334	2.97929	0.000280374
XUT0337	4.50648	1.30024e-79
XUT0338	3.46551	7.45556e-06
XUT0340	4.23877	0.000122103
XUT0343	4.7277	0.00107782
XUT0344	2.74445	3.07437e-13
XUT0346	2.20347	2.61642e-12
XUT0347	6.8914	2.1129e-27
XUT0348	3.36519	0.0387465
XUT0349	2.87328	1.13858e-13
XUT0351	5.54127	1.14628e-15
XUT0353	9.09252	4.12359e-31
XUT0355	12.6678	3.07883e-30
XUT0359	4.87889	3.30618e-34
XUT0361	3.58837	2.2787e-14
XUT0364	3.08559	2.64648e-05
XUT0370	2.77422	0.00775644
XUT0371	4.91183	2.28114e-10
XUT0373	5.94293	0.000192925
XUT0380	7.64907	5.1544e-21
XUT0384	4.5926	3.75908e-06
XUT0386	2.92251	1.10989e-10
XUT0387	11.2369	1.19893e-25
XUT0389	3.73127	0.0247534
XUT0393	3.14574	3.45573e-15
XUT0394	5.74198	1.56675e-07
XUT0395	11.8287	2.5133e-156
XUT0396	14.0927	1.91435e-82
XUT0397	4.70916	8.14833e-06
XUT0398	9.28355	1.33549e-07
XUT0400	2.0511	0.0157833
XUT0401	5.31055	7.68053e-06
XUT0407	6.9793	2.58036e-84
XUT0408	5.11735	2.98165e-12
XUT0410	3.98584	0.000380177
XUT0413	2.62981	5.19369e-28
XUT0416	2.35469	0.0317504
XUT0417	7.71599	0.000459715
XUT0419	3.04123	0.00125193
XUT0423	3.85027	1.72189e-06
XUT0424	2.54824	7.13282e-05
XUT0426	3.4818	1.48654e-06
XUT0427	4.16196	8.11473e-12
XUT0432	2.30763	0.0435533
XUT0433	3.12679	2.16683e-10
XUT0435	3.83692	7.56086e-19
XUT0441	3.001	1.49589e-08
XUT0453	2.22829	0.0113661
XUT0455	2.60002	0.009018
XUT0460	2.03428	5.31531e-05
XUT0466	3.17079	0.0268361
XUT0467	37.8077	3.11924e-102
XUT0470	5.44113	3.98849e-50
XUT0471	3.04857	1.44109e-11
XUT0474	3.84866	0.0390432
XUT0479	4.24188	1.55228e-106
XUT0491	3.18382	0.049749
XUT0495	3.47562	2.81529e-05
XUT0498	7.07867	4.01269e-07
XUT0502	5.67518	0.00369705
XUT0503	6.1239	9.40056e-09
XUT0504	9.49912	2.64282e-13
XUT0508	2.51025	3.97784e-09
XUT0513	2.1517	0.000103973
XUT0517	2.8668	1.67103e-13
XUT0521	2.02434	3.89111e-06
XUT0524	2.95367	9.27589e-09
XUT0528	2.64659	2.98849e-08
XUT0532	5.83942	2.19486e-23
XUT0534	3.69207	0.000338967
XUT0537	14.3785	3.97338e-18
XUT0539	2.82008	0.000244015
XUT0540	2.574	0.011496
XUT0541	3.36398	3.19575e-27
XUT0543	5.36789	3.13225e-127
XUT0550	3.15208	1.24395e-05
XUT0552	2.39039	2.43977e-07
XUT0557	5.58895	2.33889e-16
XUT0559	7.3985	1.34164e-07
XUT0560	4.15428	1.04839e-06
XUT0561	3.0894	0.00231325
XUT0570	15.03	2.06446e-60
XUT0572	18.773	3.38925e-21
XUT0577	2.07061	1.47993e-05
XUT0579	4.10295	4.79469e-08
XUT0580	5.87702	0.00306248
XUT0583	4.18	1.17923e-11
XUT0585	4.485	1.20047e-05
XUT0592	3.24446	7.18775e-06
XUT0594	4.50122	1.02966e-14
XUT0596	2.77772	5.51823e-07
XUT0598	2.62305	0.00303807
XUT0599	6.11317	5.89505e-12
XUT0600	2.08551	0.00192639
XUT0602	4.13082	3.83223e-07
XUT0604	6.00764	4.03461e-11
XUT0606	2.54463	0.00281975
XUT0607	3.28928	1.00884e-39
XUT0608	5.55614	9.6699e-09
XUT0609	3.37973	8.73706e-16
XUT0611	2.21393	0.0483138
XUT0612	2.37938	0.007252
XUT0614	2.26959	0.0103676
XUT0618	2.99491	5.1941e-60
XUT0619	2.40037	0.00515877
XUT0621	2.41158	0.00076659
XUT0622	3.24063	0.000327342
XUT0624	5.26309	0.00124535
XUT0625	3.94804	0.0418099
XUT0627	2.61823	0.000101653
XUT0628	3.99978	0.000114221
XUT0629	5.30208	9.54306e-12
XUT0631	2.55265	0.0113725
XUT0633	4.64331	7.35581e-19
XUT0634	3.53593	0.000236205
XUT0635	3.29879	3.48561e-06
XUT0637	4.39918	1.18431e-14
XUT0640	8.8864	8.35597e-08
XUT0642	2.10907	0.00202198
XUT0643	4.66481	5.46151e-26
XUT0644	5.45567	5.99112e-32
XUT0645	6.35038	2.99254e-06
XUT0646	2.93716	5.5252e-06
XUT0650	2.43287	0.0331531
XUT0653	3.37041	0.000285646
XUT0655	2.59668	2.56523e-34
XUT0657	8.96188	1.08207e-24
XUT0662	5.2783	7.05938e-17
XUT0663	11.2419	1.08382e-62
XUT0664	2.67389	0.0236454
XUT0665	2.81088	0.000209151
XUT0666	4.28152	2.14335e-13
XUT0675	3.89218	1.69539e-05
XUT0676	6.47963	6.57359e-17
XUT0677	4.53906	0.0327883
XUT0678	2.99425	2.14199e-08
XUT0682	6.16908	0.0011165
XUT0683	2.2956	0.0344945
XUT0684	3.85814	5.71103e-20
XUT0685	2.71263	6.98342e-23
XUT0689	6.90323	1.11293e-16
XUT0691	2.72061	0.00353593
XUT0693	7.80154	6.13873e-13
XUT0698	6.65413	0.00925532
XUT0701	14.6538	0.000181399
XUT0704	2.5256	0.00359268
XUT0707	11.036	7.77423e-30
XUT0711	26.2108	7.70297e-07
XUT0712	2.34455	0.00316632
XUT0715	4.48187	0.000258891
XUT0717	2.43509	0.000204558
XUT0718	3.00468	0.0243168
XUT0720	3.6664	0.00768817
XUT0721	10.9126	4.5567e-34
XUT0722	4.95113	0.000116588
XUT0723	4.94714	0.00475278
XUT0725	2.19851	0.00656445
XUT0726	3.72772	1.04112e-14
XUT0728	3.57303	0.0072586
XUT0732	3.72303	3.44827e-05
XUT0733	3.88886	2.70817e-05
XUT0734	8.61192	1.01646e-56
XUT0735	6.75783	2.96363e-30
XUT0736	2.25095	0.00535966
XUT0737	7.45597	3.34234e-10
XUT0739	13.4146	2.98403e-24
XUT0743	6.06162	5.6792e-17
XUT0750	2.06476	0.00502659
XUT0752	4.96938	4.13355e-05
XUT0756	2.11771	1.24922e-10
XUT0757	5.3339	9.20498e-08
XUT0760	4.79547	8.51552e-12
XUT0762	2.25456	2.48644e-19
XUT0764	2.61971	1.08972e-05
XUT0770	3.35772	1.94365e-05
XUT0772	4.43233	1.31173e-05
XUT0773	3.74895	4.1672e-06
XUT0774	18.7125	1.12842e-27
XUT0776	3.16633	0.0185701
XUT0777	5.83635	4.87401e-07
XUT0779	2.30407	0.0234235
XUT0780	2.3793	3.43345e-10
XUT0781	8.11287	0.00157169
XUT0782	3.71594	0.000469277
XUT0789	2.61681	0.0368904
XUT0790	4.02471	0.00780696
XUT0791	3.50435	1.36212e-10
XUT0792	2.19797	5.1572e-18
XUT0793	2.88008	0.000295554
XUT0796	3.09847	0.025307
XUT0797	5.03803	1.505e-05
XUT0800	3.36378	9.64011e-13
XUT0801	4.99151	3.82763e-27
XUT0802	2.82639	3.24825e-107
XUT0804	7.37084	8.66862e-38
XUT0807	4.86738	4.58519e-10
XUT0808	22.9067	7.86591e-102
XUT0810	3.61503	8.77131e-21
XUT0811	4.18024	0.0243227
XUT0812	2.68294	0.0484244
XUT0820	7.58568	7.04744e-44
XUT0821	14.168	5.87777e-07
XUT0822	3.58596	0.0224853
XUT0823	4.73498	1.74981e-08
XUT0824	3.50803	0.0365216
XUT0826	4.83465	1.79108e-29
XUT0827	6.97108	1.3663e-18
XUT0830	2.71638	0.00590834
XUT0831	3.05906	2.32237e-08
XUT0834	3.56002	0.0159087
XUT0835	3.0312	0.0139687
XUT0838	4.01339	1.47906e-11
XUT0842	2.63266	1.27157e-34
XUT0843	2.07777	4.04178e-07
XUT0844	2.56591	9.06241e-05
XUT0847	4.18979	3.5497e-37
XUT0849	3.86081	7.56515e-13
XUT0851	6.17163	4.57858e-29
XUT0854	6.27904	6.3782e-25
XUT0856	2.5926	1.0595e-06
XUT0857	4.90513	4.43278e-07
XUT0858	3.53002	0.00167743
XUT0860	2.87347	4.83589e-16
XUT0861	2.61237	0.00237315
XUT0862	3.65053	0.0310671
XUT0865	3.645	0.0180528
XUT0867	11.1758	2.30309e-17
XUT0868	6.54353	1.65192e-05
XUT0869	8.78372	1.96792e-18
XUT0872	9.64247	3.17973e-11
XUT0873	4.38515	1.60851e-09
XUT0874	3.39309	3.01638e-20
XUT0876	2.11586	4.20945e-29
XUT0877	3.29311	0.000440164
XUT0880	3.39545	7.50259e-18
XUT0881	2.88193	0.000322988
XUT0885	3.87531	1.07082e-06
XUT0887	2.5837	1.34929e-09
XUT0889	5.60137	6.92733e-29
XUT0893	6.22587	0.000518575
XUT0894	7.49774	4.86512e-08
XUT0897	3.34808	0.0347454
XUT0898	3.55693	0.043883
XUT0900	8.441	3.67431e-40
XUT0901	6.99541	3.70214e-13
XUT0902	3.44224	0.000681648
XUT0908	30.331	2.39563e-20
XUT0910	2.58415	3.4711e-07
XUT0912	2.4592	2.86466e-11
XUT0913	2.64393	5.36302e-08
XUT0916	5.53932	9.44823e-05
XUT0918	48.7918	5.75134e-142
XUT0919	9.08514	1.45932e-12
XUT0920	13.8153	3.82763e-27
XUT0921	13.7416	6.22814e-46
XUT0924	4.32453	2.52823e-08
XUT0927	3.39696	0.00737018
XUT0928	8.47406	1.92375e-07
XUT0931	3.73531	0.0217424
XUT0933	2.27443	0.000266796
XUT0934	2.93762	0.0106392
XUT0939	2.66358	5.75917e-26
XUT0941	4.11354	4.00354e-10
XUT0944	4.7535	1.03113e-25
XUT0948	4.6095	1.23864e-10
XUT0951	4.76856	0.00210511
XUT0954	3.78005	2.01419e-26
XUT0957	4.19227	1.84453e-26
XUT0958	2.96239	2.44363e-108
XUT0960	12.442	1.11443e-43
XUT0962	4.9638	1.36907e-22
XUT0963	9.55705	4.47219e-32
XUT0964	5.78221	6.69348e-06
XUT0965	2.4413	1.05274e-10
XUT0968	2.89467	1.33565e-07
XUT0969	2.53689	0.000108149
XUT0970	2.87019	0.00596193
XUT0971	3.23195	7.12349e-12
XUT0972	5.70747	2.55572e-11
XUT0973	4.01172	0.00143704
XUT0974	6.45932	1.17462e-05
XUT0975	3.49205	4.38865e-08
XUT0981	5.08332	0.00302246
XUT0983	4.18427	0.00263662
XUT0986	3.40037	5.04168e-06
XUT0991	5.73973	0.0160803
XUT0992	9.68677	6.93839e-73
XUT0994	3.43825	0.00584659
XUT0998	5.33243	1.99687e-07
XUT1000	3.69382	8.14334e-10
XUT1007	3.15164	0.0130165
XUT1012	2.53448	5.37294e-19
XUT1017	11.4415	2.41779e-18
XUT1020	2.3443	2.89843e-13
