# Supplementary material for: Endogenous RNAi pathway evolutionarily shapes the destiny of the antisense lncRNAs transcriptome
Source: Life Sci Alliance. 2019 Aug 28;2(5):e201900407. doi: 10.26508/lsa.201900407 (PMC6713810; doi:10.26508/lsa.201900407)
Supplement: Supplementary file 2 [file LSA-2019-00407_TableS2.xlsx]

## Sheet: Xrn1-sensitive CUTs
ID	xrn1/WT ratio	Adjusted P-value
CUT0002	4.81028	0.00163491
CUT0003	4.20072	4.56803e-08
CUT0004	3.71499	9.64706e-11
CUT0005	3.10303	1.34122e-16
CUT0006	16.4764	6.50626e-40
CUT0008	2.08747	0.00315943
CUT0009	4.63998	1.04959e-13
CUT0010	22.4059	3.73338e-71
CUT0016	6.51858	0.000172274
CUT0018	4.85364	0.00203371
CUT0019	9.03829	2.62266e-28
CUT0020	12.5434	3.53324e-09
CUT0021	6.27257	7.1387e-07
CUT0022	3.57119	0.010533
CUT0023	4.45345	0.0138255
CUT0024	6.1793	1.4666e-05
CUT0025	21.9907	3.15243e-27
CUT0027	7.43945	0.000805055
CUT0030	4.40997	3.10673e-17
CUT0038	4.17763	0.0144344
CUT0039	19.2267	1.14505e-47
CUT0040	7.4769	0.00018162
CUT0041	2.99451	0.000400817
CUT0045	8.49156	2.99258e-39
CUT0046	5.90775	5.25316e-05
CUT0049	2.8921	6.35141e-06
CUT0052	7.73256	0.00010856
CUT0057	2.47598	0.0221286
CUT0059	6.22271	3.21994e-09
CUT0061	8.44272	2.48311e-33
CUT0064	5.41492	8.24175e-18
CUT0065	3.61816	0.00540743
CUT0069	2.45403	4.84526e-05
CUT0070	2.68756	0.0207163
CUT0071	7.25145	3.06074e-17
CUT0074	2.12903	6.36748e-05
CUT0077	3.15326	0.0499424
CUT0078	3.97624	1.16075e-07
CUT0079	8.18978	0.000304421
CUT0082	5.32852	1.05908e-08
CUT0083	11.6347	9.60718e-194
CUT0084	17.7227	1.11187e-111
CUT0088	6.40468	0.000208958
CUT0091	3.2773	0.0144912
CUT0093	2.48787	0.000708633
CUT0097	3.02419	3.53285e-05
CUT0101	9.34008	2.57707e-44
CUT0102	2.88405	0.00501796
CUT0105	2.74955	1.86951e-05
CUT0107	3.5782	0.0472203
CUT0109	8.35223	1.19469e-13
CUT0110	11.6325	7.27603e-39
CUT0113	4.95479	6.69387e-34
CUT0114	4.53924	2.39971e-05
CUT0115	3.28796	0.0211743
CUT0116	4.65358	0.000548849
CUT0119	8.35625	3.94922e-11
CUT0121	5.74338	1.7001e-34
CUT0123	3.68101	0.00441931
CUT0125	33.256	3.20278e-205
CUT0128	5.72855	5.45811e-07
CUT0130	5.32107	2.92705e-21
CUT0133	3.11828	0.00889931
CUT0137	4.96347	0.0237765
CUT0139	5.43133	2.051e-10
CUT0141	2.31951	0.0019577
CUT0145	4.59203	3.82541e-24
CUT0148	20.5555	3.88258e-51
CUT0149	16.4364	1.13708e-39
CUT0150	4.68506	8.60846e-08
CUT0151	2.15208	0.0072
CUT0152	3.22754	1.60451e-07
CUT0158	6.23457	8.15783e-28
CUT0159	2.63143	0.0204469
CUT0168	5.65159	0.000270129
CUT0170	15.3955	4.02154e-09
CUT0171	11.3848	7.24502e-40
CUT0172	9.93655	5.61665e-28
CUT0173	2.86512	0.0191642
CUT0176	6.06435	2.24314e-06
CUT0178	4.11264	0.0021456
CUT0184	4.55967	5.05929e-08
CUT0185	4.92847	1.2453e-05
CUT0186	4.16198	0.00207495
CUT0187	2.13163	6.78366e-05
CUT0188	13.5724	9.20608e-07
CUT0189	4.11707	8.50278e-17
CUT0191	7.5968	3.42235e-05
CUT0193	2.92361	0.00676768
CUT0194	2.86732	0.0498467
CUT0197	13.6472	1.65792e-08
CUT0198	5.9562	6.46964e-16
CUT0199	8.45356	3.40738e-16
CUT0200	21.4203	1.75816e-09
CUT0201	14.4762	9.96507e-16
CUT0202	4.69451	3.16659e-09
CUT0205	25.3316	2.34404e-55
CUT0206	7.43861	3.79602e-18
CUT0208	17.336	8.4815e-09
CUT0209	4.6241	4.92776e-05
CUT0212	2.24807	4.82173e-06
CUT0213	6.22522	5.35971e-07
CUT0214	3.70029	5.99085e-06
CUT0215	4.39391	0.00224724
CUT0216	7.20829	8.38374e-11
CUT0217	14.9328	2.34252e-10
CUT0220	12.9956	4.91029e-51
CUT0223	2.96049	1.08399e-12
CUT0224	13.6351	4.07292e-68
CUT0225	4.90952	1.36385e-80
CUT0227	2.40247	5.88877e-08
CUT0229	10.9552	3.57727e-57
CUT0230	2.87366	0.0360952
CUT0231	3.00673	0.00787295
CUT0235	8.6673	5.63563e-08
CUT0236	2.97448	0.049902
CUT0241	2.40223	0.00300464
CUT0243	3.62639	8.52126e-08
CUT0245	3.79645	0.00288285
CUT0247	9.90593	3.12065e-101
CUT0248	4.30984	6.98638e-21
CUT0249	4.1292	0.0368458
CUT0250	5.05545	0.0141766
CUT0255	10.4299	4.00867e-25
CUT0259	2.77269	0.00248865
CUT0260	8.83542	4.84178e-05
CUT0261	8.956	1.87976e-08
CUT0263	8.80666	2.95628e-15
CUT0264	2.07538	0.0449142
CUT0266	3.73174	0.0241491
CUT0267	7.1125	0.0110379
CUT0268	3.13403	0.0176141
CUT0270	3.98524	9.10303e-05
CUT0271	2.26115	3.10798e-05
CUT0272	9.69499	1.08341e-31
CUT0273	4.50215	1.0048e-10
CUT0274	7.51946	6.87913e-10
CUT0276	2.39402	0.00471294
CUT0278	3.49903	0.0100831
CUT0283	9.07067	1.1718e-170
CUT0284	4.42548	1.58964e-06
CUT0285	2.31183	0.00798217
CUT0287	4.6156	2.22855e-05
CUT0290	3.04211	0.0120647
CUT0291	2.9804	0.0266148
CUT0292	8.02024	5.94188e-06
CUT0293	9.78727	0.00049477
CUT0296	7.0091	0.0103565
CUT0297	17.3999	3.06746e-08
CUT0298	7.48616	2.3851e-19
CUT0300	6.507	1.75254e-12
CUT0303	3.69437	4.93498e-10
CUT0307	14.122	1.10289e-70
CUT0308	10.7164	0.000207564
CUT0310	4.12502	1.26095e-27
CUT0311	7.19996	2.82316e-07
CUT0313	4.42585	0.000331469
CUT0314	14.8444	1.7617e-49
CUT0315	11.1277	2.10164e-204
CUT0318	4.89754	1.88859e-21
CUT0319	3.09427	0.00497075
CUT0320	5.0156	0.0103307
CUT0321	4.34514	0.00593582
CUT0322	2.3321	0.0122169
CUT0324	25.1028	2.49624e-06
CUT0325	32.6025	2.01256e-10
CUT0326	3.82356	3.57809e-05
CUT0327	8.89945	0.000179888
CUT0328	18.1081	1.26676e-21
CUT0329	27.558	3.67299e-13
CUT0331	3.99283	1.68567e-05
CUT0332	4.62529	0.0199209
CUT0335	2.93531	0.00584341
CUT0336	4.87239	0.000226771
CUT0337	3.17746	1.01746e-06
CUT0341	3.45176	0.0010192
CUT0345	4.29053	1.26666e-09
CUT0348	37.0909	2.66265e-68
CUT0350	14.3135	1.13143e-07
CUT0352	4.86659	2.06658e-08
CUT0353	4.87804	2.01226e-06
CUT0354	3.35139	1.7558e-13
CUT0357	12.3977	1.77296e-111
CUT0361	3.51236	2.94787e-05
CUT0363	5.26851	0.0335523
CUT0364	5.59807	0.00026938
CUT0365	6.16543	0.000334449
CUT0366	3.54199	6.09271e-05
CUT0367	8.51689	1.7742e-50
CUT0369	4.69823	0.00324044
CUT0372	11.0609	6.50255e-21
CUT0373	5.40785	0.000942949
CUT0375	7.28997	0.0104637
CUT0378	2.94927	0.0483767
CUT0382	4.53237	0.0366831
CUT0383	6.43793	0.00773467
CUT0384	3.68927	1.80287e-05
CUT0385	2.68687	0.0346622
CUT0386	4.24289	2.74749e-25
CUT0390	17.403	1.03506e-71
CUT0392	12.0241	0.000112501
CUT0393	2.71761	0.015393
CUT0397	3.98806	0.0299121
CUT0399	3.53064	0.0018563
CUT0402	10.5848	1.00319e-19
CUT0403	6.18475	1.09555e-05
CUT0404	9.70392	5.08968e-18
CUT0405	4.83288	1.43369e-05
CUT0408	7.96109	1.53927e-10
CUT0410	3.5117	0.000348285
CUT0412	4.59438	0.00311766
CUT0413	3.09334	0.0495856
CUT0416	7.60678	0.000181151
CUT0417	18.7963	7.26196e-127
CUT0419	5.39363	0.0208252
CUT0422	14.9239	3.29748e-07
CUT0423	10.5842	3.38748e-06
CUT0424	5.24188	2.0317e-06
CUT0425	2.80558	5.72001e-12
CUT0427	4.70863	1.07438e-05
CUT0428	2.39645	0.000648571
CUT0431	3.76592	1.33417e-07
CUT0432	4.07697	6.56968e-12
CUT0433	5.18494	0.00272836
CUT0438	3.17481	1.00365e-10
CUT0439	20.0627	7.59842e-19
CUT0440	9.19082	3.41699e-06
CUT0441	4.55504	9.99345e-08
CUT0442	6.80707	0.010583
CUT0443	6.71183	2.55031e-14
CUT0445	6.1012	0.00125439
CUT0446	8.3306	1.60805e-17
CUT0447	7.26112	1.39108e-89
CUT0448	8.44247	1.29249e-11
CUT0449	11.784	1.13086e-12
CUT0450	4.81378	0.00132148
CUT0451	5.78789	0.00402962
CUT0454	2.55637	0.00586492
CUT0455	2.64958	0.00119168
CUT0457	2.35376	0.0346753
CUT0458	2.92857	4.55987e-09
CUT0459	11.4058	5.80835e-67
CUT0461	3.43908	0.0272564
CUT0462	10.013	1.40563e-06
CUT0464	22.0936	1.02267e-118
CUT0468	6.34595	0.00577513
CUT0469	8.51963	0.00048832
CUT0470	11.2639	5.79002e-12
CUT0471	19.003	5.09366e-30
CUT0472	8.80821	1.02016e-32
CUT0478	2.71239	0.00011238
CUT0480	10.0919	7.86604e-26
CUT0481	29.7314	8.42113e-10
CUT0486	9.39329	1.46367e-15
CUT0487	34.7312	5.6665e-40
CUT0488	4.71184	2.18881e-14
CUT0489	2.69296	0.00333094
CUT0492	5.0914	4.54339e-11
CUT0501	2.94451	0.039758
CUT0504	6.99646	1.86336e-06
CUT0505	3.70493	0.0222336
CUT0506	2.80753	0.00399223
CUT0510	3.98957	0.0148669
CUT0511	4.90825	0.00128397
CUT0512	3.49103	0.000510061
CUT0515	9.23097	6.36059e-16
CUT0516	4.47945	2.98849e-05
CUT0519	3.07567	2.22604e-12
CUT0520	4.19731	9.86024e-06
CUT0521	4.38476	0.0102248
CUT0522	7.79345	0.00326711
CUT0525	4.09305	0.0345299
CUT0526	9.90911	5.63202e-72
CUT0527	6.3006	3.96811e-05
CUT0529	2.69942	0.0383827
CUT0531	4.29078	2.95347e-11
CUT0532	3.99782	2.2345e-05
CUT0533	6.02632	0.000147431
CUT0538	4.92039	0.0266703
CUT0541	3.49592	0.0404787
CUT0543	2.88487	0.0374499
CUT0544	4.87823	5.16215e-78
CUT0545	2.581	1.87632e-06
CUT0546	14.8856	7.6108e-09
CUT0548	8.71528	1.65804e-105
CUT0552	2.79865	0.00019403
CUT0553	7.48257	1.76762e-07
CUT0557	5.38715	4.31706e-09
CUT0558	6.02302	2.32967e-27
CUT0563	7.0081	3.14657e-09
CUT0564	10.1875	7.76493e-08
CUT0565	4.55182	2.73662e-12
CUT0567	3.27914	0.0124319
CUT0568	4.6001	1.29369e-10
CUT0569	10.7609	2.14672e-30
CUT0571	2.48322	1.02392e-08
CUT0574	6.30404	4.06262e-30
CUT0576	2.48254	0.00402295
CUT0578	2.36934	1.07404e-05
CUT0587	4.25501	3.47677e-05
CUT0590	2.15707	0.00574816
CUT0596	4.12559	3.55593e-15
CUT0598	3.78048	2.01086e-06
CUT0603	3.15181	1.20843e-18
CUT0604	4.01231	2.44536e-18
CUT0608	6.03816	7.72184e-05
CUT0614	2.64429	0.0385715
CUT0615	2.63768	0.0282042
CUT0616	6.81104	2.66678e-13
CUT0626	4.71099	1.08835e-05
CUT0629	3.88752	0.0115141
CUT0632	2.81387	0.028436
CUT0633	5.43323	6.86357e-09
CUT0634	3.44594	0.000293386
CUT0636	2.62223	0.0151072
CUT0637	3.94804	1.92745e-06
CUT0640	3.96886	0.00891898
CUT0641	4.72604	6.4747e-08
CUT0642	15.5403	6.24477e-33
CUT0643	20.4375	1.15142e-93
CUT0644	3.58891	0.0339633
CUT0647	9.98061	1.28661e-27
CUT0650	3.46519	1.15439e-08
CUT0657	2.16848	2.2758e-06
CUT0658	3.25522	0.00285272
CUT0662	4.96912	2.47276e-34
CUT0663	7.06061	2.41175e-35
CUT0668	3.99921	7.7793e-07
CUT0669	8.37156	0.000149849
CUT0670	9.27768	4.31529e-27
CUT0675	13.3555	4.4625e-67
CUT0676	9.8331	1.0075e-100
CUT0680	6.04716	4.74539e-18
CUT0681	6.59743	2.25126e-12
CUT0686	3.45241	0.0274331
CUT0688	3.7709	0.00414709
CUT0689	2.8923	0.00558785
CUT0691	2.51572	0.0147172
CUT0692	2.61572	0.0270006
CUT0693	3.32227	0.000606146
CUT0696	4.06774	0.0449002
CUT0697	2.54965	0.00913378
CUT0698	14.2441	1.26802e-116
CUT0700	4.06029	4.07787e-52
CUT0703	20.2576	3.40146e-15
CUT0705	3.63544	0.0114345
CUT0707	2.25094	0.0100191
CUT0708	19.4276	3.13283e-12
CUT0710	7.24859	5.00712e-06
CUT0711	7.07468	2.23023e-10
CUT0712	4.67492	0.0166871
CUT0713	2.85553	0.0110172
CUT0719	3.91441	4.68958e-06
CUT0720	7.05409	7.11227e-18
CUT0724	3.87827	0.000346871
CUT0725	4.10523	0.00204372
CUT0726	7.71485	6.9719e-05
CUT0733	23.263	4.81114e-24
CUT0739	6.13021	0.000558464
CUT0740	3.91085	0.0315372
CUT0743	2.32483	0.00492923
CUT0745	21.1903	1.23384e-21
CUT0747	4.46287	7.5997e-11
CUT0748	5.61328	3.36861e-07
CUT0749	9.25968	7.20208e-31
CUT0751	2.48195	0.0309369
CUT0752	3.49853	6.38722e-05
CUT0755	4.04242	0.0355654
CUT0756	2.56656	0.0128241
CUT0761	9.29488	0.000955233
CUT0762	5.1226	1.62817e-28
CUT0764	8.42545	2.03635e-32
CUT0767	12.2493	5.80482e-34
CUT0769	2.18249	3.6009e-09
CUT0771	5.97989	6.48657e-10
CUT0775	2.82219	0.00271468
CUT0776	3.94882	0.0114218
CUT0778	49.0596	6.6657e-16
CUT0779	4.4304	0.000327195
CUT0780	8.6786	8.72792e-11
CUT0784	15.2864	2.33561e-13
CUT0785	11.8059	5.56076e-14
CUT0786	10.8162	1.67836e-08
CUT0787	10.3094	0.000461865
CUT0794	4.71404	0.000162077
CUT0796	3.87314	9.76409e-19
CUT0797	8.07922	8.68608e-09
CUT0798	4.07376	0.0263152
CUT0801	7.47835	1.14541e-55
CUT0802	3.99074	0.00506768
CUT0811	9.17675	1.2999e-10
CUT0813	2.23375	0.0290948
CUT0818	2.36428	0.000608763
CUT0819	3.17727	0.0162027
CUT0821	8.57076	6.66407e-104
CUT0822	23.6527	3.75524e-69
CUT0823	10.77	8.50534e-10
CUT0825	7.58837	0.000702517
CUT0828	5.88914	0.000783969
CUT0829	2.52797	0.000348043
CUT0830	4.1601	3.70296e-06
CUT0833	6.39318	0.000240512
CUT0834	5.18486	1.25235e-09
CUT0835	13.2499	2.23643e-11
CUT0837	8.25717	7.16867e-30
CUT0838	8.90283	9.87128e-16
CUT0839	5.63815	4.73745e-39
CUT0842	4.98965	0.000873052
CUT0843	3.18788	8.84812e-06
CUT0844	2.64222	0.0148083
CUT0845	4.575	5.85363e-08
CUT0846	4.41388	0.00457376
CUT0847	12.4415	1.19873e-29
CUT0850	2.56143	0.010803
CUT0851	4.14978	4.26944e-32
CUT0852	10.7962	2.67301e-37
CUT0854	4.40289	0.0368932
CUT0855	11.999	1.50491e-43
CUT0858	2.96884	0.00924205
CUT0860	4.06525	0.00175078
CUT0865	3.56134	0.00069408
CUT0867	4.67315	0.0476329
CUT0868	10.211	3.00675e-06
CUT0869	3.8684	0.00215199
CUT0871	11.1997	1.93935e-119
CUT0873	2.79107	0.000258121
CUT0876	6.702	3.18871e-12
CUT0878	3.91168	1.20243e-06
CUT0879	5.05248	0.0034557
CUT0880	6.87474	0.00618637
CUT0882	6.34954	1.90687e-15
CUT0883	2.77186	0.0115901
CUT0885	3.94087	0.0106833
CUT0886	5.87127	7.11498e-05
CUT0888	6.57931	6.19632e-10
CUT0889	3.96141	2.75153e-22
CUT0891	3.34452	0.00350437
CUT0896	15.7186	5.21725e-13
CUT0898	8.05205	2.65848e-25
CUT0900	2.62509	0.00334364
CUT0903	11.9679	0.000234214
CUT0904	3.12514	0.00205711
CUT0905	2.93897	0.0241007
CUT0906	3.31494	5.0824e-19
CUT0908	12.5993	2.26001e-135
CUT0915	3.25393	0.00259697
CUT0917	3.84748	0.000281883
CUT0919	2.765	0.0261423
CUT0920	13.4409	8.94994e-13
CUT0921	5.43185	0.00660669
CUT0924	2.55961	0.0264998
CUT0926	7.74217	1.28032e-06
CUT0932	2.36597	0.0473945
CUT0933	4.61678	0.00977767
CUT0934	4.08296	0.000745031
CUT0936	3.14656	5.68888e-05
CUT0940	10.2885	0.00215676
CUT0941	7.37539	8.74755e-07
CUT0946	3.22208	0.000467347
CUT0948	3.94392	0.000813685
CUT0951	6.94646	6.01982e-08
CUT0953	3.95993	6.34027e-07
CUT0955	19.7182	4.2109e-75
CUT0961	8.26507	5.7786e-08
CUT0963	39.4808	2.13839e-68
CUT0968	3.07718	0.00270498
CUT0969	3.52233	0.000829284
CUT0970	2.7713	2.53143e-05
CUT0971	16.3032	1.57028e-35
CUT0972	4.10521	1.67497e-13
CUT0979	4.28268	2.90487e-06
CUT0980	4.81874	5.74233e-05
CUT0981	3.36099	1.17621e-11
CUT0982	6.79754	1.4259e-05
CUT0985	10.7017	1.10143e-16
CUT0986	2.7266	6.9699e-05
CUT0987	5.6811	5.84531e-05
CUT0988	4.79158	7.49237e-06
CUT0994	5.5277	3.21989e-05
CUT0995	2.97583	0.000451901
CUT0996	3.35011	0.00141094
CUT0998	10.0686	8.98426e-08
CUT0999	5.83256	0.00156642
CUT1005	5.72263	1.28782e-07
CUT1011	2.9101	3.8662e-05
CUT1015	3.55182	0.000469125
CUT1016	7.53623	1.00228e-14
CUT1018	5.23655	0.000615659
CUT1021	4.55034	5.31799e-37
CUT1022	2.40498	0.000232313
CUT1024	7.29014	1.80575e-18
CUT1027	7.87673	2.24339e-17
CUT1029	3.75418	0.00257863
CUT1030	5.14559	0.000133881
CUT1031	5.21252	8.65642e-05
CUT1033	4.35101	2.873e-05
CUT1034	7.05494	3.10798e-05
CUT1035	7.37761	1.46212e-07
CUT1037	5.94636	0.00130272
CUT1045	3.97473	0.00525227
CUT1048	6.14373	2.21295e-38
CUT1055	17.7165	4.55569e-60
CUT1056	7.29055	1.01918e-83
CUT1057	13.4649	8.57611e-14
CUT1058	4.37716	0.0100299
CUT1059	5.74699	0.000247287
CUT1062	2.71555	0.00317148
CUT1063	3.79059	1.92961e-17
CUT1065	3.39188	5.00842e-10
CUT1066	2.96089	2.61823e-54
CUT1069	3.74725	1.96033e-10
CUT1072	3.78821	5.49693e-05
CUT1074	4.54883	2.26624e-06
CUT1075	2.76565	0.00017719
CUT1076	4.09813	1.21906e-16
CUT1080	3.48397	0.0112994
CUT1082	2.41207	0.0335661
CUT1086	2.03051	0.00109031
CUT1091	3.7925	2.1782e-14
CUT1092	3.89586	1.09191e-06
CUT1094	6.18241	2.09139e-11
CUT1095	5.43963	0.0120552
CUT1096	9.02962	3.29448e-18
CUT1097	6.22881	2.61837e-06
CUT1099	3.78723	0.00110514
CUT1100	2.60258	0.0312819
CUT1102	3.64341	9.63508e-08
CUT1105	16.8221	1.77582e-31
CUT1108	4.68429	8.27579e-57
CUT1109	18.854	2.80444e-35
CUT1110	11.1208	1.8573e-19
CUT1111	5.47346	3.41138e-14
CUT1112	16.7613	1.38803e-98
CUT1113	5.59635	0.00205413
CUT1114	16.0464	2.46037e-83
CUT1115	6.93977	1.82492e-18
CUT1117	11.046	1.83257e-05
CUT1118	7.03427	9.34053e-06
CUT1121	7.41181	3.13207e-18
CUT1122	8.08656	3.31118e-34
CUT1123	3.13901	0.00139057
CUT1125	5.58023	1.55285e-05
CUT1128	16.6077	4.54806e-05
CUT1129	8.27658	0.00203159
CUT1130	4.98965	0.00114496
CUT1133	16.7889	5.23452e-11
CUT1137	5.17723	0.000599277
CUT1138	8.97023	5.0722e-31
CUT1139	10.8747	4.08858e-12
CUT1141	18.0563	7.7109e-93
CUT1143	2.61881	0.00239168
CUT1144	4.93555	8.56431e-77
CUT1145	2.70214	1.94539e-05
CUT1150	9.02158	2.25252e-12
CUT1152	2.61564	0.0145679
CUT1154	26.2974	3.9756e-180
CUT1155	7.39161	9.24846e-11
CUT1156	2.6671	0.0343395
CUT1157	4.14079	0.0120045
CUT1158	4.07019	7.27854e-06
CUT1161	2.73944	0.000975507
CUT1162	3.70204	0.0436451
CUT1163	2.24058	0.00127055
CUT1167	3.9465	0.00484746
CUT1168	2.22298	0.040773
CUT1173	12.6182	1.95667e-06
CUT1174	5.12454	4.97072e-05
CUT1181	4.97778	1.33812e-18
CUT1183	2.8081	0.0115403
CUT1184	4.44747	0.000158828
CUT1185	2.51591	1.35477e-09
CUT1187	19.745	4.38583e-09
CUT1188	10.018	7.7615e-72
CUT1189	2.59643	2.2829e-06
CUT1190	4.39383	0.00729293
CUT1192	4.38383	0.00125991
CUT1196	6.87083	0.000608786
CUT1198	7.55547	4.59829e-11
CUT1201	5.87198	6.30649e-13
CUT1202	4.03372	1.34794e-06
CUT1204	4.66107	0.00176312
CUT1205	4.69716	0.00688974
CUT1218	4.9792	0.0190162
CUT1221	4.53209	1.18024e-13
CUT1222	6.54841	1.994e-30
CUT1225	3.58747	0.00147622
CUT1226	6.79754	2.98228e-05
CUT1228	2.18549	0.00889931
CUT1230	6.57848	0.0113661
CUT1232	3.2344	0.000991655
CUT1233	3.04945	2.78479e-17
CUT1234	3.77916	3.4062e-09
CUT1245	12.5522	0.000189553
CUT1246	4.23947	0.0206935
CUT1247	15.9672	1.0299e-85
CUT1248	7.77671	4.82644e-12
CUT1249	7.35722	0.00952258
CUT1251	3.44954	3.14502e-09
CUT1253	2.23929	2.83798e-06
CUT1260	6.40018	1.10045e-26
CUT1261	6.01466	7.69384e-150
CUT1264	2.06582	6.50461e-08
CUT1270	5.02697	1.49523e-13
CUT1271	3.32698	9.58954e-22
CUT1272	10.6235	8.55652e-09
CUT1273	7.10036	4.22922e-51
CUT1275	5.56591	8.31562e-23
CUT1276	2.6945	0.0117302
CUT1277	10.5351	3.15638e-82
CUT1279	2.60466	0.0227204
